# Supplementary material
Source: publisher figshare collection journal article supplement (https://acs.figshare.com/ndownloader/files/3857260)
Supplement: Supplementary file 1 [file 3857260]

Supporting Information for:

**‘Green’ thermoset resin derived from non-edible starch via esterification using a novel catalyst**

Namrata V. Patil and Anil N. Netravali

Department of Fiber Science & Apparel Design  
Cornell University  
37 Forest Home Drive, Ithaca, NY 14853

**Supporting Information Contains:**

**Figure S.1** ATR-FTIR spectra of the MSS-BTCA-NaP crosslinked film after treating with 0.1 M NaOH

**Figure S.2** Tensile stress vs strain plot of corn starch crosslinked with BTCA as a crosslinker using different catalysts (SHP and NaP)

**Figure S.3** DSC thermogram of washed and unwashed MSS-BTCA-SHP films

**Figure S.4** DTGA of MSS, MSS-BTCA-SHP and MSS-BTCA-NaP crosslinked films

Total Number of pages: 4

Total Number of figures: 4

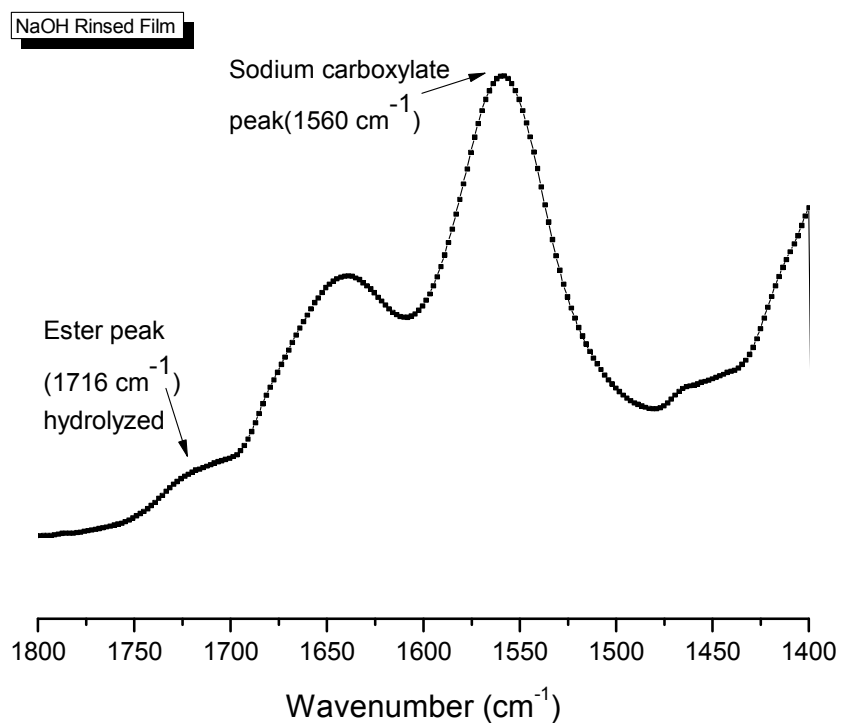

**Figure S.1** ATR-FTIR spectra of the MSS-BTCA-NaP crosslinked film after treating with 0.1 M NaOH.

The ester group (peak observed at  $1716 \text{ cm}^{-1}$ ) is hydrolyzed in presence of an alkali. Thus the absorption at  $1716 \text{ cm}^{-1}$  reduces when treated with NaOH while the absorption at  $1560 \text{ cm}^{-1}$  grows sharper due to the formation of sodium carboxylates.

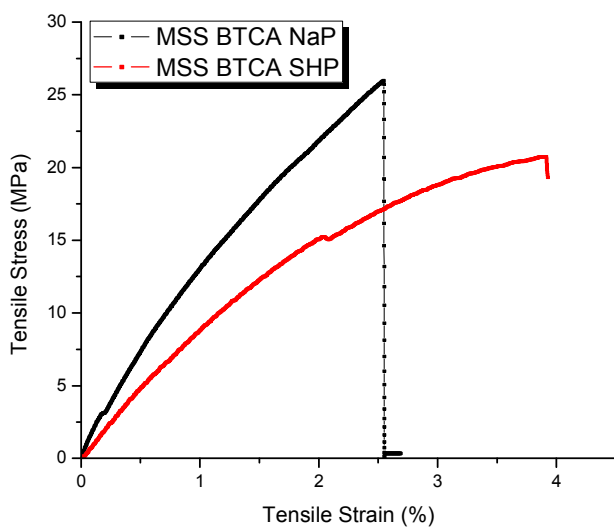

**Figure S.2** Tensile stress vs strain plot of corn starch crosslinked with BTCA as a crosslinker using different catalysts (SHP and NaP).

The higher strength in the corn starch films crosslinked using BTCA-NaP indicate that higher crosslinking as compared to that using BTCA-SHP.

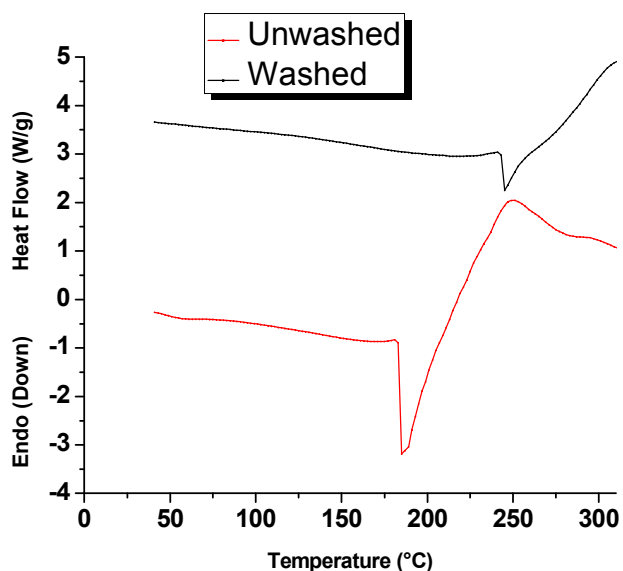

**Figure S.3** DSC thermogram of washed and unwashed MSS-BTCA-SHP films.

The unwashed films showed an endothermic peak at 190 °C corresponding to the melting temperature of the unreacted BTCA present in the crystalline form in the film. This peak disappears completely after washing showing that the excess unreacted BTCA can be washed away with water.

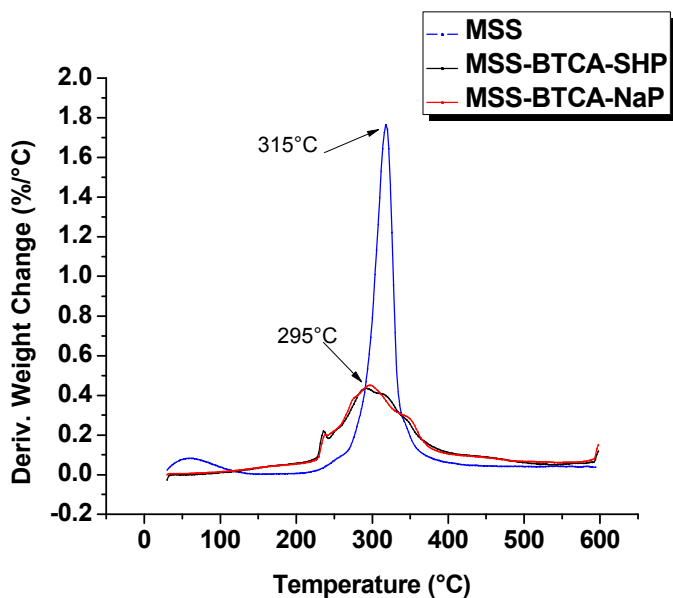

**Figure S.4** DTGA of MSS, MSS-BTCA-SHP and MSS-BTCA-NaP crosslinked films.

The DTGA plot is constructed from the TGA plots to see the maximum degradation temperature which is defined as the temperature at which the rate of weight loss reduces significantly (observed after the specimen has degraded). The maximum degradation temperature of MSS was observed to be 315 °C which reduced to 295 °C after crosslinking.
